# Supplementary material for: Global analysis of DNA methylation in young (J1) and senescent (J2) Gossypium hirsutum L. cotyledons by MeDIP-Seq
Source: PLoS One. 2017 Jul 17;12(7):e0179141. doi: 10.1371/journal.pone.0179141 (PMC5513416; doi:10.1371/journal.pone.0179141)
Supplement: S3 Table — (XLSX) [file pone.0179141.s003.xlsx]

## Sheet: Sheet1
S3 Table. Sequencing depth of J1 and J2.
J1			J2
Sequencing depth	Depth≥x	Depth=x	Sequencing depth	Depth≥x	Depth=x
1	44.5741	17.6965	1	44.3274	17.7077
2	26.8776	9.43758	2	26.6197	9.42073
3	17.44	5.68666	3	17.199	5.59983
4	11.7534	3.64293	4	11.5991	3.54263
5	8.11046	2.42563	5	8.05652	2.3439
6	5.68483	1.65753	6	5.71262	1.60149
7	4.0273	1.1528	7	4.11113	1.11893
8	2.8745	0.811689	8	2.9922	0.796239
9	2.06281	0.577034	9	2.19596	0.574088
10	1.48578	0.412393	10	1.62187	0.417488
11	1.07339	0.296192	11	1.20438	0.30682
12	0.777193	0.213367	12	0.89756	0.226252
13	0.563826	0.154009	13	0.671309	0.167712
14	0.409817	0.111217	14	0.503596	0.124795
15	0.2986	0.0805098	15	0.378802	0.0930979
16	0.21809	0.0584102	16	0.285704	0.0695045
17	0.15968	0.0423202	17	0.216199	0.0522736
18	0.11736	0.0306405	18	0.163926	0.0392798
19	0.0867194	0.0222629	19	0.124646	0.0294347
20	0.0644565	0.0162495	20	0.095211	0.0220125
21	0.048207	0.0118259	21	0.0731985	0.0165495
22	0.0363811	0.00856704	22	0.056649	0.0124268
23	0.0278141	0.00621201	23	0.0442222	0.00941853
24	0.0216021	0.00455956	24	0.0348037	0.00716625
25	0.0170425	0.00336408	25	0.0276374	0.00542923
26	0.0136784	0.00252812	26	0.0222082	0.00415309
27	0.0111503	0.0018995	27	0.0180551	0.00320173
28	0.00925079	0.00142441	28	0.0148533	0.00246605
29	0.00782638	0.00111412	29	0.0123873	0.00188426
30	0.00671226	0.000862836	30	0.010503	0.00151395
31	0.00584943	0.000681426	31	0.00898909	0.00118539
32	0.005168	0.00054144	32	0.0078037	0.000948427
33	0.00462656	0.000436509	33	0.00685527	0.000744097
34	0.00419005	0.000370445	34	0.00611117	0.000607598
35	0.0038196	0.00030889	35	0.00550357	0.00050527
36	0.00351072	0.000259795	36	0.0049983	0.000435765
37	0.00325092	0.000217766	37	0.00456254	0.000358729
38	0.00303315	0.000186617	38	0.00420381	0.000300707
39	0.00284654	0.000167509	39	0.0039031	0.000264118
40	0.00267903	0.000152771	40	0.00363899	0.000221346
41	0.00252626	0.000130874	41	0.00341764	0.000200193
42	0.00239538	0.000117903	42	0.00321745	0.00017267
43	0.00227748	0.000107814	43	0.00304478	0.000163185
44	0.00216967	9.94919e-05	44	0.00288159	0.000143938
45	0.00207017	9.66094e-05	45	0.00273765	0.000128131
46	0.00197357	8.99146e-05	46	0.00260952	0.000116136
47	0.00188365	8.60558e-05	47	0.00249339	0.000108186
48	0.0017976	8.13137e-05	48	0.0023852	9.77252e-05
49	0.00171628	7.31777e-05	49	0.00228748	9.27041e-05
50	0.0016431	5.98811e-05	50	0.00219477	8.97751e-05
51	0.00158322	5.89048e-05	51	0.002105	7.89891e-05
52	0.00152432	5.40232e-05	52	0.00202601	7.38286e-05
53	0.00147029	5.14196e-05	53	0.00195218	7.08996e-05
54	0.00141888	5.13267e-05	54	0.00188128	7.01557e-05
55	0.00136755	4.90951e-05	55	0.00181112	6.45302e-05
56	0.00131845	4.79328e-05	56	0.00174659	5.88118e-05
57	0.00127052	4.58871e-05	57	0.00168778	5.57898e-05
58	0.00122463	3.94248e-05	58	0.00163199	5.14196e-05
59	0.00118521	3.92853e-05	59	0.00158057	5.07688e-05
60	0.00114592	3.51011e-05	60	0.0015298	4.71424e-05
61	0.00111082	3.17537e-05	61	0.00148266	4.72354e-05
62	0.00107907	2.98941e-05	62	0.00143543	4.45854e-05
63	0.00104917	3.22651e-05	63	0.00139084	4.24933e-05
64	0.00101691	3.09634e-05	64	0.00134835	4.01222e-05
65	0.000985946	2.81274e-05	65	0.00130823	3.98897e-05
66	0.000957819	2.83133e-05	66	0.00126834	3.43108e-05
67	0.000929505	2.69186e-05	67	0.00123402	3.21256e-05
68	0.000902587	2.48265e-05	68	0.0012019	3.24046e-05
69	0.00087776	2.39431e-05	69	0.00116949	3.21256e-05
70	0.000853817	2.32458e-05	70	0.00113737	2.97081e-05
71	0.000830571	2.2223e-05	71	0.00110766	2.743e-05
72	0.000808348	2.14326e-05	72	0.00108023	2.99405e-05
73	0.000786916	2.04563e-05	73	0.00105029	2.68721e-05
74	0.000766459	1.91545e-05	74	0.00102342	2.35712e-05
75	0.000747305	1.73878e-05	75	0.000999847	2.41291e-05
76	0.000729917	1.86431e-05	76	0.000975718	2.09212e-05
77	0.000711274	1.54352e-05	77	0.000954797	2.26879e-05
78	0.000695839	1.60861e-05	78	0.000932109	2.31528e-05
79	0.000679753	1.52027e-05	79	0.000908956	2.24089e-05
80	0.00066455	1.34825e-05	80	0.000886547	2.16651e-05
81	0.000651067	1.47843e-05	81	0.000864882	2.1851e-05
82	0.000636283	1.29246e-05	82	0.000843031	1.948e-05
83	0.000623358	1.32966e-05	83	0.000823551	1.83177e-05
84	0.000610062	1.31106e-05	84	0.000805233	1.77598e-05
85	0.000596951	1.1065e-05	85	0.000787474	1.78063e-05
86	0.000585886	1.1158e-05	86	0.000769667	1.69229e-05
87	0.000574728	1.12045e-05	87	0.000752744	1.61791e-05
88	0.000563524	1.1065e-05	88	0.000736565	1.69229e-05
89	0.000552459	9.71673e-06	89	0.000719642	1.74343e-05
90	0.000542742	1.04141e-05	90	0.000702208	1.53422e-05
91	0.000532328	1.03211e-05	91	0.000686866	1.52957e-05
92	0.000522007	9.11234e-06	92	0.00067157	1.60396e-05
93	0.000512895	1.01816e-05	93	0.000655531	1.46913e-05
94	0.000502713	1.00887e-05	94	0.000640839	1.43659e-05
95	0.000492624	9.29831e-06	95	0.000626473	1.3808e-05
96	0.000483326	8.83339e-06	96	0.000612665	1.31571e-05
97	0.000474493	8.83339e-06	97	0.000599508	1.19948e-05
98	0.000465659	9.53076e-06	98	0.000587513	1.0879e-05
99	0.000456128	7.62461e-06	99	0.000576634	1.00422e-05
100	0.000448504	9.99568e-06	100	0.000566592	9.76322e-06
101	0.000438508	8.97287e-06	101	0.000556829	1.04141e-05
102	0.000429535	8.08953e-06	102	0.000546415	8.74041e-06
103	0.000421446	6.46232e-06	103	0.000537675	9.25181e-06
104	0.000414983	8.50795e-06	104	0.000528423	9.62375e-06
105	0.000406475	7.02022e-06	105	0.000518799	8.92637e-06
106	0.000399455	6.46232e-06	106	0.000509873	8.46146e-06
107	0.000392993	6.36934e-06	107	0.000501411	8.46146e-06
108	0.000386624	6.36934e-06	108	0.00049295	7.6711e-06
109	0.000380254	8.97287e-06	109	0.000485279	8.13602e-06
110	0.000371281	6.41583e-06	110	0.000477143	7.6711e-06
111	0.000364866	6.32285e-06	111	0.000469471	6.64829e-06
112	0.000358543	4.3702e-06	112	0.000462823	7.81058e-06
113	0.000354172	5.53249e-06	113	0.000455013	7.1132e-06
114	0.00034864	5.95092e-06	114	0.000447899	5.62548e-06
115	0.000342689	5.06758e-06	115	0.000442274	6.36934e-06
116	0.000337622	5.90442e-06	116	0.000435905	6.18337e-06
117	0.000331717	6.32285e-06	117	0.000429721	7.1132e-06
118	0.000325394	6.32285e-06	118	0.000422608	6.22987e-06
119	0.000319071	5.53249e-06	119	0.000416378	5.71846e-06
120	0.000313539	7.20619e-06	120	0.00041066	5.57898e-06
121	0.000306333	5.06758e-06	121	0.000405081	7.20619e-06
122	0.000301265	5.06758e-06	122	0.000397875	5.39302e-06
123	0.000296198	4.97459e-06	123	0.000392482	5.62548e-06
124	0.000291223	4.3702e-06	124	0.000386856	5.11407e-06
125	0.000286853	4.27722e-06	125	0.000381742	6.64829e-06
126	0.000282576	3.71932e-06	126	0.000375094	5.11407e-06
127	0.000278856	3.90529e-06	127	0.00036998	5.02109e-06
128	0.000274951	4.4167e-06	128	0.000364959	5.02109e-06
129	0.000270534	3.44037e-06	129	0.000359937	4.78863e-06
130	0.000267094	3.39388e-06	130	0.000355149	5.99741e-06
131	0.0002637	3.39388e-06	131	0.000349151	5.34653e-06
132	0.000260306	3.25441e-06	132	0.000343805	4.13775e-06
133	0.000257052	3.11493e-06	133	0.000339667	4.23073e-06
134	0.000253937	2.743e-06	134	0.000335436	4.32371e-06
135	0.000251194	2.65002e-06	135	0.000331113	5.30003e-06
136	0.000248544	3.39388e-06	136	0.000325813	4.4167e-06
137	0.00024515	3.81231e-06	137	0.000321396	4.97459e-06
138	0.000241338	3.95178e-06	138	0.000316421	4.69564e-06
139	0.000237386	4.09125e-06	139	0.000311726	4.50968e-06
140	0.000233295	3.3009e-06	140	0.000307216	5.11407e-06
141	0.000229994	3.20792e-06	141	0.000302102	4.50968e-06
142	0.000226786	3.71932e-06	142	0.000297592	3.62634e-06
143	0.000223066	3.62634e-06	143	0.000293966	3.20792e-06
144	0.00021944	2.92897e-06	144	0.000290758	3.48686e-06
145	0.000216511	2.78949e-06	145	0.000287271	3.99827e-06
146	0.000213722	2.1851e-06	146	0.000283273	3.48686e-06
147	0.000211536	3.02195e-06	147	0.000279786	3.76581e-06
148	0.000208515	2.743e-06	148	0.00027602	2.55703e-06
149	0.000205772	1.99914e-06	149	0.000273463	4.23073e-06
150	0.000203772	2.13861e-06	150	0.000269232	4.88161e-06
151	0.000201634	2.55703e-06	151	0.000264351	4.9281e-06
152	0.000199077	2.37107e-06	152	0.000259423	3.3009e-06
153	0.000196706	3.20792e-06	153	0.000256122	3.25441e-06
154	0.000193498	1.72019e-06	154	0.000252867	2.83598e-06
155	0.000191778	2.09212e-06	155	0.000250031	2.65002e-06
156	0.000189685	1.6737e-06	156	0.000247381	4.32371e-06
157	0.000188012	2.32458e-06	157	0.000243058	3.76581e-06
158	0.000185687	1.6737e-06	158	0.000239292	2.92897e-06
159	0.000184013	1.99914e-06	159	0.000236363	3.11493e-06
160	0.000182014	1.95264e-06	160	0.000233248	3.20792e-06
161	0.000180062	1.48773e-06	161	0.00023004	2.46405e-06
162	0.000178574	1.95264e-06	162	0.000227576	3.57985e-06
163	0.000176621	1.48773e-06	163	0.000223996	3.44037e-06
164	0.000175134	1.39475e-06	164	0.000220556	3.06844e-06
165	0.000173739	1.30176e-06	165	0.000217487	2.69651e-06
166	0.000172437	1.06931e-06	166	0.000214791	2.46405e-06
167	0.000171368	1.34825e-06	167	0.000212327	2.1851e-06
168	0.00017002	1.30176e-06	168	0.000210142	2.51054e-06
169	0.000168718	1.58071e-06	169	0.000207631	2.65002e-06
170	0.000167137	1.48773e-06	170	0.000204981	2.1851e-06
171	0.000165649	1.72019e-06	171	0.000202796	3.3009e-06
172	0.000163929	2.13861e-06	172	0.000199495	1.85966e-06
173	0.000161791	1.58071e-06	173	0.000197636	2.60353e-06
174	0.00016021	1.90615e-06	174	0.000195032	1.99914e-06
175	0.000158304	1.6737e-06	175	0.000193033	1.53422e-06
176	0.00015663	1.48773e-06	176	0.000191499	2.04563e-06
177	0.000155142	1.85966e-06	177	0.000189453	2.09212e-06
178	0.000153283	1.16229e-06	178	0.000187361	1.81317e-06
179	0.00015212	1.06931e-06	179	0.000185548	1.30176e-06
180	0.000151051	1.81317e-06	180	0.000184246	1.53422e-06
181	0.000149238	1.90615e-06	181	0.000182712	1.76668e-06
182	0.000147332	1.39475e-06	182	0.000180945	1.58071e-06
183	0.000145937	1.34825e-06	183	0.000179364	1.34825e-06
184	0.000144589	1.58071e-06	184	0.000178016	1.72019e-06
185	0.000143008	1.6737e-06	185	0.000176296	1.53422e-06
186	0.000141334	9.76322e-07	186	0.000174762	1.6272e-06
187	0.000140358	6.0439e-07	187	0.000173134	9.29831e-07
188	0.000139754	7.90356e-07	188	0.000172205	1.25527e-06
189	0.000138963	5.11407e-07	189	0.000170949	1.44124e-06
190	0.000138452	1.20878e-06	190	0.000169508	1.6272e-06
191	0.000137243	1.90615e-06	191	0.000167881	2.09212e-06
192	0.000135337	6.97373e-07	192	0.000165789	1.30176e-06
193	0.000134639	5.57898e-07	193	0.000164487	1.16229e-06
194	0.000134082	5.57898e-07	194	0.000163325	1.81317e-06
195	0.000133524	7.43865e-07	195	0.000161512	1.34825e-06
196	0.00013278	1.02281e-06	196	0.000160163	1.44124e-06
197	0.000131757	6.97373e-07	197	0.000158722	1.6272e-06
198	0.00013106	7.90356e-07	198	0.000157095	1.44124e-06
199	0.000130269	2.78949e-07	199	0.000155654	1.39475e-06
200	0.00012999	7.43865e-07	200	0.000154259	1.30176e-06
201	0.000129246	5.11407e-07	201	0.000152957	2.04563e-06
202	0.000128735	6.0439e-07	202	0.000150912	1.06931e-06
203	0.000128131	1.39475e-06	203	0.000149842	9.76322e-07
204	0.000126736	9.76322e-07	204	0.000148866	9.76322e-07
205	0.00012576	7.90356e-07	205	0.00014789	9.76322e-07
206	0.000124969	7.90356e-07	206	0.000146913	8.36848e-07
207	0.000124179	1.39475e-06	207	0.000146076	1.06931e-06
208	0.000122784	1.39475e-06	208	0.000145007	1.6737e-06
209	0.000121389	2.23159e-06	209	0.000143333	1.85966e-06
210	0.000119158	5.11407e-07	210	0.000141474	9.29831e-07
211	0.000118646	6.50881e-07	211	0.000140544	9.76322e-07
212	0.000117996	1.06931e-06	212	0.000139568	8.83339e-07
213	0.000116926	1.30176e-06	213	0.000138684	1.16229e-06
214	0.000115624	9.76322e-07	214	0.000137522	8.36848e-07
215	0.000114648	7.90356e-07	215	0.000136685	6.97373e-07
216	0.000113858	4.18424e-07	216	0.000135988	8.36848e-07
217	0.000113439	1.02281e-06	217	0.000135151	5.11407e-07
218	0.000112417	8.36848e-07	218	0.000134639	7.90356e-07
219	0.00011158	5.57898e-07	219	0.000133849	9.76322e-07
220	0.000111022	7.43865e-07	220	0.000132873	1.25527e-06
221	0.000110278	6.97373e-07	221	0.000131618	7.43865e-07
222	0.000109581	6.50881e-07	222	0.000130874	7.90356e-07
223	0.00010893	8.83339e-07	223	0.000130083	7.90356e-07
224	0.000108046	6.0439e-07	224	0.000129293	1.20878e-06
225	0.000107442	5.11407e-07	225	0.000128084	5.57898e-07
226	0.000106931	6.50881e-07	226	0.000127526	5.57898e-07
227	0.00010628	3.25441e-07	227	0.000126968	7.43865e-07
228	0.000105954	5.11407e-07	228	0.000126225	8.36848e-07
229	0.000105443	1.30176e-06	229	0.000125388	1.1158e-06
230	0.000104141	9.76322e-07	230	0.000124272	8.36848e-07
231	0.000103165	5.11407e-07	231	0.000123435	4.18424e-07
232	0.000102653	3.71932e-07	232	0.000123017	6.97373e-07
233	0.000102281	4.18424e-07	233	0.000122319	6.97373e-07
234	0.000101863	4.18424e-07	234	0.000121622	5.57898e-07
235	0.000101445	7.90356e-07	235	0.000121064	8.36848e-07
236	0.000100654	1.39475e-07	236	0.000120227	6.50881e-07
237	0.000100515	6.97373e-07	237	0.000119576	6.50881e-07
238	9.98173e-05	8.36848e-07	238	0.000118925	7.90356e-07
239	9.89805e-05	8.36848e-07	239	0.000118135	3.71932e-07
240	9.81436e-05	5.57898e-07	240	0.000117763	7.43865e-07
241	9.75857e-05	3.71932e-07	241	0.000117019	7.90356e-07
242	9.72138e-05	7.43865e-07	242	0.000116229	4.64915e-07
243	9.64699e-05	1.02281e-06	243	0.000115764	7.90356e-07
244	9.54471e-05	9.76322e-07	244	0.000114974	8.36848e-07
245	9.44708e-05	6.97373e-07	245	0.000114137	4.64915e-07
246	9.37734e-05	8.36848e-07	246	0.000113672	7.43865e-07
247	9.29366e-05	6.97373e-07	247	0.000112928	6.0439e-07
248	9.22392e-05	5.11407e-07	248	0.000112324	9.29831e-07
249	9.17278e-05	2.32458e-07	249	0.000111394	6.0439e-07
250	9.14953e-05	3.25441e-07	250	0.000110789	5.57898e-07
251	9.11699e-05	5.57898e-07	251	0.000110231	4.64915e-07
252	9.0612e-05	4.64915e-07	252	0.000109767	4.18424e-07
253	9.01471e-05	4.64915e-07	253	0.000109348	4.64915e-07
254	8.96822e-05	2.78949e-07	254	0.000108883	2.78949e-07
255	8.94032e-05	6.50881e-07	255	0.000108604	5.57898e-07
256	8.87523e-05	5.57898e-07	256	0.000108046	3.71932e-07
257	8.81944e-05	5.11407e-07	257	0.000107674	4.18424e-07
258	8.7683e-05	4.18424e-07	258	0.000107256	2.78949e-07
259	8.72646e-05	2.32458e-07	259	0.000106977	1.02281e-06
260	8.70321e-05	4.64915e-07	260	0.000105954	3.71932e-07
261	8.65672e-05	4.18424e-07	261	0.000105582	7.90356e-07
262	8.61488e-05	6.50881e-07	262	0.000104792	3.71932e-07
263	8.54979e-05	1.44124e-06	263	0.00010442	5.11407e-07
264	8.40567e-05	2.32458e-07	264	0.000103909	5.57898e-07
265	8.38242e-05	6.97373e-07	265	0.000103351	3.71932e-07
266	8.31269e-05	5.11407e-07	266	0.000102979	3.25441e-07
267	8.26155e-05	3.71932e-07	267	0.000102653	2.32458e-07
268	8.22435e-05	3.71932e-07	268	0.000102421	6.50881e-07
269	8.18716e-05	6.0439e-07	269	0.00010177	5.11407e-07
270	8.12672e-05	7.90356e-07	270	0.000101259	5.11407e-07
271	8.04768e-05	4.18424e-07	271	0.000100747	9.29831e-08
272	8.00584e-05	4.64915e-07	272	0.000100654	8.36848e-07
273	7.95935e-05	1.85966e-07	273	9.98173e-05	1.85966e-07
274	7.94075e-05	4.18424e-07	274	9.96314e-05	7.90356e-07
275	7.89891e-05	3.71932e-07	275	9.8841e-05	5.11407e-07
276	7.86172e-05	3.71932e-07	276	9.83296e-05	1.85966e-07
277	7.82452e-05	2.78949e-07	277	9.81436e-05	4.64915e-07
278	7.79663e-05	6.0439e-07	278	9.76787e-05	7.43865e-07
279	7.73619e-05	3.25441e-07	279	9.69348e-05	4.18424e-07
280	7.70365e-05	2.32458e-07	280	9.65164e-05	5.11407e-07
281	7.6804e-05	3.25441e-07	281	9.6005e-05	4.18424e-07
282	7.64786e-05	5.57898e-07	282	9.55866e-05	7.90356e-07
283	7.59207e-05	3.25441e-07	283	9.47962e-05	4.18424e-07
284	7.55952e-05	4.18424e-07	284	9.43778e-05	6.0439e-07
285	7.51768e-05	1.39475e-07	285	9.37734e-05	3.71932e-07
286	7.50373e-05	5.57898e-07	286	9.34015e-05	3.25441e-07
287	7.44794e-05	3.25441e-07	287	9.3076e-05	3.25441e-07
288	7.4154e-05	2.78949e-07	288	9.27506e-05	4.64915e-07
289	7.3875e-05	1.85966e-07	289	9.22857e-05	4.18424e-07
290	7.36891e-05	2.32458e-07	290	9.18673e-05	3.25441e-07
291	7.34566e-05	8.83339e-07	291	9.15418e-05	2.78949e-07
292	7.25733e-05	3.25441e-07	292	9.12629e-05	4.64915e-07
293	7.22478e-05	3.71932e-07	293	9.0798e-05	6.50881e-07
294	7.18759e-05	4.18424e-07	294	9.01471e-05	5.57898e-07
295	7.14575e-05	5.57898e-07	295	8.95892e-05	4.64915e-07
296	7.08996e-05	2.78949e-07	296	8.91243e-05	5.57898e-07
297	7.06206e-05	2.32458e-07	297	8.85664e-05	4.64915e-07
298	7.03882e-05	4.18424e-07	298	8.81015e-05	5.11407e-07
299	6.99698e-05	3.71932e-07	299	8.759e-05	7.43865e-07
300	6.95978e-05	2.32458e-07	300	8.68462e-05	1.95264e-06
301	6.93654e-05	2.78949e-07	301	8.48935e-05	4.64915e-07
302	6.90864e-05	4.64915e-07	302	8.44286e-05	4.18424e-07
303	6.86215e-05	3.71932e-07	303	8.40102e-05	4.18424e-07
304	6.82496e-05	2.32458e-07	304	8.35918e-05	7.43865e-07
305	6.80171e-05	3.71932e-07	305	8.28479e-05	9.29831e-07
306	6.76452e-05	1.85966e-07	306	8.19181e-05	4.64915e-07
307	6.74592e-05	1.39475e-07	307	8.14532e-05	8.36848e-07
308	6.73197e-05	2.78949e-07	308	8.06163e-05	2.78949e-07
309	6.70408e-05	1.85966e-07	310	8.03374e-05	2.32458e-07
310	6.68548e-05	2.32458e-07	311	8.01049e-05	4.18424e-07
311	6.66224e-05	1.85966e-07	312	7.96865e-05	2.78949e-07
312	6.64364e-05	3.25441e-07	313	7.94075e-05	3.71932e-07
313	6.6111e-05	3.25441e-07	314	7.90356e-05	4.18424e-07
314	6.57855e-05	2.78949e-07	315	7.86172e-05	4.64915e-07
315	6.55066e-05	1.85966e-07	316	7.81523e-05	2.78949e-07
316	6.53206e-05	5.57898e-07	317	7.78733e-05	3.71932e-07
317	6.47627e-05	5.57898e-07	318	7.75014e-05	2.32458e-07
318	6.42048e-05	1.85966e-07	319	7.72689e-05	1.39475e-07
319	6.40188e-05	3.71932e-07	320	7.71295e-05	3.25441e-07
320	6.36469e-05	3.71932e-07	321	7.6804e-05	2.78949e-07
321	6.3275e-05	2.78949e-07	322	7.65251e-05	1.85966e-07
322	6.2996e-05	1.39475e-07	323	7.63391e-05	1.85966e-07
323	6.28566e-05	1.39475e-07	324	7.61531e-05	2.32458e-07
324	6.27171e-05	1.39475e-07	325	7.59207e-05	3.71932e-07
325	6.25776e-05	2.32458e-07	326	7.55487e-05	1.20878e-06
326	6.23451e-05	3.25441e-07	327	7.434e-05	2.32458e-07
327	6.20197e-05	2.32458e-07	328	7.41075e-05	4.64915e-08
328	6.17872e-05	3.71932e-07	329	7.4061e-05	3.25441e-07
329	6.14153e-05	1.39475e-07	330	7.37356e-05	3.25441e-07
330	6.12758e-05	2.78949e-07	331	7.34101e-05	8.83339e-07
331	6.09969e-05	2.32458e-07	332	7.25268e-05	6.0439e-07
332	6.07644e-05	9.29831e-08	333	7.19224e-05	8.36848e-07
333	6.06714e-05	4.64915e-08	334	7.10856e-05	1.39475e-07
334	6.0625e-05	9.29831e-08	336	7.09461e-05	1.85966e-07
335	6.0532e-05	4.64915e-08	337	7.07601e-05	1.39475e-07
336	6.04855e-05	1.39475e-07	338	7.06206e-05	1.39475e-07
337	6.0346e-05	2.32458e-07	339	7.04812e-05	1.39475e-07
338	6.01136e-05	1.85966e-07	340	7.03417e-05	2.78949e-07
339	5.99276e-05	1.39475e-07	341	7.00627e-05	1.85966e-07
340	5.97881e-05	1.39475e-07	342	6.98768e-05	1.85966e-07
341	5.96486e-05	9.29831e-08	343	6.96908e-05	2.32458e-07
342	5.95557e-05	2.32458e-07	344	6.94583e-05	3.25441e-07
343	5.93232e-05	9.29831e-08	345	6.91329e-05	5.57898e-07
344	5.92302e-05	1.39475e-07	346	6.8575e-05	3.25441e-07
345	5.90907e-05	9.29831e-08	347	6.82496e-05	3.25441e-07
346	5.89978e-05	1.85966e-07	348	6.79241e-05	1.85966e-07
347	5.88118e-05	1.39475e-07	349	6.77382e-05	1.85966e-07
348	5.86723e-05	1.85966e-07	350	6.75522e-05	1.39475e-07
349	5.84863e-05	9.29831e-08	351	6.74127e-05	1.85966e-07
350	5.83934e-05	1.85966e-07	352	6.72268e-05	3.25441e-07
351	5.82074e-05	9.29831e-08	353	6.69013e-05	1.39475e-07
352	5.81144e-05	9.29831e-08	354	6.67618e-05	2.78949e-07
353	5.80214e-05	9.29831e-08	355	6.64829e-05	1.85966e-07
354	5.79284e-05	1.39475e-07	356	6.62969e-05	1.39475e-07
355	5.7789e-05	1.85966e-07	357	6.61575e-05	1.85966e-07
356	5.7603e-05	1.39475e-07	358	6.59715e-05	4.18424e-07
357	5.74635e-05	9.29831e-08	359	6.55531e-05	3.25441e-07
358	5.73706e-05	9.29831e-08	360	6.52276e-05	2.32458e-07
359	5.72776e-05	1.39475e-07	361	6.49952e-05	1.85966e-07
361	5.71381e-05	1.39475e-07	362	6.48092e-05	2.32458e-07
362	5.69986e-05	4.64915e-08	363	6.45767e-05	4.64915e-07
363	5.69521e-05	1.39475e-07	364	6.41118e-05	1.39475e-07
364	5.68127e-05	1.85966e-07	365	6.39723e-05	2.78949e-07
365	5.66267e-05	1.85966e-07	366	6.36934e-05	4.18424e-07
366	5.64407e-05	4.64915e-08	367	6.3275e-05	1.85966e-07
367	5.63942e-05	1.39475e-07	368	6.3089e-05	1.85966e-07
368	5.62548e-05	1.39475e-07	369	6.2903e-05	1.39475e-07
369	5.61153e-05	1.39475e-07	370	6.27636e-05	3.71932e-07
370	5.59758e-05	9.29831e-08	371	6.23916e-05	1.39475e-07
371	5.58828e-05	4.64915e-08	372	6.22522e-05	1.85966e-07
372	5.58363e-05	4.64915e-08	373	6.20662e-05	9.29831e-08
373	5.57898e-05	1.85966e-07	374	6.19732e-05	3.71932e-07
374	5.56039e-05	9.29831e-08	375	6.16013e-05	3.25441e-07
375	5.55109e-05	9.29831e-08	376	6.12758e-05	1.85966e-07
376	5.54179e-05	1.39475e-07	377	6.10899e-05	1.85966e-07
377	5.52784e-05	1.39475e-07	378	6.09039e-05	1.85966e-07
378	5.5139e-05	1.39475e-07	379	6.07179e-05	2.78949e-07
379	5.49995e-05	9.29831e-08	380	6.0439e-05	2.78949e-07
381	5.49065e-05	4.64915e-08	381	6.016e-05	1.39475e-07
382	5.486e-05	1.39475e-07	382	6.00206e-05	1.39475e-07
383	5.47205e-05	9.29831e-08	383	5.98811e-05	1.85966e-07
384	5.46276e-05	9.29831e-08	384	5.96951e-05	4.64915e-08
385	5.45346e-05	3.25441e-07	385	5.96486e-05	3.25441e-07
386	5.42091e-05	9.29831e-08	386	5.93232e-05	4.64915e-08
387	5.41161e-05	4.64915e-08	387	5.92767e-05	1.39475e-07
388	5.40697e-05	9.29831e-08	388	5.91372e-05	1.39475e-07
389	5.39767e-05	9.29831e-08	389	5.89978e-05	1.85966e-07
390	5.38837e-05	4.64915e-08	390	5.88118e-05	3.25441e-07
391	5.38372e-05	9.29831e-08	391	5.84863e-05	2.32458e-07
392	5.37442e-05	4.64915e-08	392	5.82539e-05	4.18424e-07
393	5.36977e-05	1.39475e-07	393	5.78355e-05	3.25441e-07
394	5.35582e-05	1.85966e-07	394	5.751e-05	5.11407e-07
395	5.33723e-05	4.64915e-08	395	5.69986e-05	4.64915e-07
396	5.33258e-05	4.64915e-08	396	5.65337e-05	4.18424e-07
397	5.32793e-05	9.29831e-08	397	5.61153e-05	5.11407e-07
398	5.31863e-05	1.39475e-07	398	5.56039e-05	1.39475e-07
399	5.30468e-05	4.64915e-08	399	5.54644e-05	4.18424e-07
400	5.30003e-05	4.64915e-08	400	5.5046e-05	9.29831e-08
401	5.29539e-05	4.64915e-08	401	5.4953e-05	2.32458e-07
402	5.29074e-05	4.64915e-08	402	5.47205e-05	1.85966e-07
403	5.28609e-05	9.29831e-08	403	5.45346e-05	2.32458e-07
404	5.27679e-05	4.64915e-08	404	5.43021e-05	9.29831e-08
405	5.27214e-05	4.64915e-08	405	5.42091e-05	4.64915e-08
406	5.26749e-05	1.85966e-07	407	5.41626e-05	1.39475e-07
408	5.24889e-05	1.39475e-07	408	5.40232e-05	1.85966e-07
409	5.23495e-05	4.64915e-08	409	5.38372e-05	3.71932e-07
410	5.2303e-05	4.64915e-08	410	5.34653e-05	9.29831e-08
411	5.22565e-05	4.64915e-08	411	5.33723e-05	1.39475e-07
413	5.221e-05	1.39475e-07	412	5.32328e-05	9.29831e-08
414	5.20705e-05	4.64915e-08	414	5.31398e-05	4.64915e-08
415	5.2024e-05	9.29831e-08	416	5.30933e-05	4.64915e-08
416	5.1931e-05	9.29831e-08	417	5.30468e-05	9.29831e-08
417	5.18381e-05	4.64915e-08	418	5.29539e-05	4.64915e-08
418	5.17916e-05	2.32458e-07	419	5.29074e-05	1.85966e-07
420	5.15591e-05	9.29831e-08	420	5.27214e-05	9.29831e-08
421	5.14661e-05	2.78949e-07	421	5.26284e-05	4.64915e-08
422	5.11872e-05	3.71932e-07	422	5.25819e-05	1.39475e-07
423	5.08152e-05	6.0439e-07	423	5.24424e-05	1.39475e-07
424	5.02109e-05	3.25441e-07	424	5.2303e-05	9.29831e-08
425	4.98854e-05	3.71932e-07	425	5.221e-05	9.29831e-08
427	4.95135e-05	9.29831e-08	426	5.2117e-05	9.29831e-08
429	4.94205e-05	4.64915e-08	427	5.2024e-05	4.64915e-08
431	4.9374e-05	4.64915e-08	428	5.19775e-05	4.64915e-08
432	4.93275e-05	9.29831e-08	429	5.1931e-05	4.64915e-08
433	4.92345e-05	4.64915e-08	430	5.18846e-05	4.64915e-08
434	4.9188e-05	1.39475e-07	432	5.18381e-05	9.29831e-08
435	4.90486e-05	9.29831e-08	433	5.17451e-05	4.64915e-08
436	4.89556e-05	4.64915e-08	434	5.16986e-05	4.64915e-08
439	4.89091e-05	9.29831e-08	435	5.16521e-05	9.29831e-08
440	4.88161e-05	9.29831e-08	436	5.15591e-05	9.29831e-08
441	4.87231e-05	4.64915e-08	439	5.14661e-05	4.64915e-08
444	4.86766e-05	1.39475e-07	440	5.14196e-05	4.64915e-08
445	4.85372e-05	4.64915e-08	441	5.13731e-05	9.29831e-08
447	4.84907e-05	9.29831e-08	442	5.12802e-05	1.39475e-07
448	4.83977e-05	1.39475e-07	443	5.11407e-05	9.29831e-08
451	4.82582e-05	4.64915e-08	444	5.10477e-05	2.32458e-07
452	4.82117e-05	1.39475e-07	445	5.08152e-05	1.85966e-07
454	4.80722e-05	4.64915e-08	446	5.06293e-05	2.32458e-07
456	4.80258e-05	9.29831e-08	447	5.03968e-05	4.64915e-08
457	4.79328e-05	1.39475e-07	448	5.03503e-05	9.29831e-08
458	4.77933e-05	4.64915e-08	449	5.02573e-05	9.29831e-08
459	4.77468e-05	4.64915e-08	450	5.01644e-05	9.29831e-08
460	4.77003e-05	4.64915e-08	451	5.00714e-05	9.29831e-08
461	4.76538e-05	1.39475e-07	452	4.99784e-05	1.85966e-07
462	4.75143e-05	4.64915e-08	453	4.97924e-05	2.32458e-07
463	4.74679e-05	1.39475e-07	454	4.956e-05	9.29831e-08
464	4.73284e-05	2.32458e-07	455	4.9467e-05	2.32458e-07
465	4.70959e-05	1.39475e-07	456	4.92345e-05	1.85966e-07
466	4.69564e-05	1.39475e-07	457	4.90486e-05	4.64915e-08
467	4.6817e-05	2.32458e-07	458	4.90021e-05	9.29831e-08
468	4.65845e-05	2.32458e-07	459	4.89091e-05	1.85966e-07
469	4.63521e-05	4.64915e-07	460	4.87231e-05	1.39475e-07
470	4.58871e-05	4.64915e-08	461	4.85837e-05	9.29831e-08
471	4.58407e-05	1.39475e-07	462	4.84907e-05	4.64915e-08
472	4.57012e-05	4.64915e-08	464	4.84442e-05	9.29831e-08
473	4.56547e-05	4.64915e-08	466	4.83512e-05	9.29831e-08
474	4.56082e-05	9.29831e-08	467	4.82582e-05	4.64915e-08
475	4.55152e-05	4.64915e-08	469	4.82117e-05	4.64915e-08
476	4.54687e-05	4.64915e-08	470	4.81652e-05	4.64915e-08
478	4.54222e-05	1.39475e-07	471	4.81187e-05	4.64915e-08
481	4.52828e-05	4.64915e-08	472	4.80722e-05	4.64915e-08
485	4.52363e-05	9.29831e-08	473	4.80258e-05	9.29831e-08
486	4.51433e-05	9.29831e-08	474	4.79328e-05	9.29831e-08
487	4.50503e-05	4.64915e-08	475	4.78398e-05	9.29831e-08
490	4.50038e-05	1.85966e-07	476	4.77468e-05	4.64915e-08
491	4.48178e-05	9.29831e-08	478	4.77003e-05	9.29831e-08
492	4.47249e-05	4.64915e-08	479	4.76073e-05	9.29831e-08
493	4.46784e-05	9.29831e-08	480	4.75143e-05	4.64915e-08
494	4.45854e-05	4.64915e-08	481	4.74679e-05	4.64915e-08
495	4.45389e-05	4.64915e-08	484	4.74214e-05	4.64915e-08
498	4.44924e-05	1.85966e-07	485	4.73749e-05	4.64915e-08
499	4.43064e-05	1.39475e-07	486	4.73284e-05	4.64915e-08
500	4.4167e-05	1.39475e-07	487	4.72819e-05	4.64915e-08
501	4.40275e-05	4.64915e-08	488	4.72354e-05	9.29831e-08
502	4.3981e-05	4.64915e-08	489	4.71424e-05	9.29831e-08
503	4.39345e-05	1.85966e-07	490	4.70494e-05	1.39475e-07
504	4.37485e-05	9.29831e-08	491	4.691e-05	9.29831e-08
505	4.36555e-05	4.64915e-08	492	4.6817e-05	4.64915e-08
507	4.36091e-05	1.85966e-07	493	4.67705e-05	9.29831e-08
508	4.34231e-05	9.29831e-08	494	4.66775e-05	1.39475e-07
509	4.33301e-05	4.64915e-08	495	4.6538e-05	1.39475e-07
514	4.32836e-05	4.64915e-08	496	4.63985e-05	4.64915e-08
515	4.32371e-05	1.39475e-07	497	4.63521e-05	4.64915e-08
517	4.30977e-05	9.29831e-08	499	4.63056e-05	4.64915e-08
523	4.30047e-05	1.39475e-07	500	4.62591e-05	4.64915e-08
525	4.28652e-05	4.64915e-08	501	4.62126e-05	1.85966e-07
528	4.28187e-05	4.64915e-08	502	4.60266e-05	9.29831e-08
529	4.27722e-05	9.29831e-08	504	4.59336e-05	9.29831e-08
531	4.26792e-05	4.64915e-08	505	4.58407e-05	4.64915e-08
532	4.26327e-05	1.85966e-07	506	4.57942e-05	4.64915e-08
534	4.24468e-05	4.64915e-08	507	4.57477e-05	1.39475e-07
536	4.24003e-05	4.64915e-08	508	4.56082e-05	1.39475e-07
537	4.23538e-05	9.29831e-08	509	4.54687e-05	1.39475e-07
538	4.22608e-05	4.64915e-08	511	4.53292e-05	9.29831e-08
539	4.22143e-05	4.64915e-08	513	4.52363e-05	9.29831e-08
540	4.21678e-05	4.64915e-08	514	4.51433e-05	9.29831e-08
541	4.21213e-05	4.64915e-08	515	4.50503e-05	1.39475e-07
542	4.20748e-05	4.64915e-08	517	4.49108e-05	4.64915e-08
543	4.20283e-05	3.25441e-07	518	4.48643e-05	2.32458e-07
545	4.17029e-05	4.64915e-08	519	4.46319e-05	1.39475e-07
546	4.16564e-05	4.64915e-08	521	4.44924e-05	9.29831e-08
547	4.16099e-05	1.39475e-07	522	4.43994e-05	9.29831e-08
548	4.14704e-05	1.85966e-07	523	4.43064e-05	1.39475e-07
549	4.12845e-05	9.29831e-08	524	4.4167e-05	9.29831e-08
550	4.11915e-05	9.29831e-08	525	4.4074e-05	9.29831e-08
551	4.10985e-05	1.39475e-07	528	4.3981e-05	9.29831e-08
552	4.0959e-05	4.64915e-08	529	4.3888e-05	4.64915e-08
557	4.09125e-05	1.39475e-07	530	4.38415e-05	9.29831e-08
558	4.07731e-05	4.64915e-08	532	4.37485e-05	4.64915e-08
562	4.07266e-05	4.64915e-08	534	4.3702e-05	4.64915e-08
566	4.06801e-05	4.64915e-08	535	4.36555e-05	4.64915e-08
569	4.06336e-05	4.64915e-08	536	4.36091e-05	4.64915e-08
570	4.05871e-05	1.39475e-07	537	4.35626e-05	9.29831e-08
571	4.04476e-05	4.64915e-08	539	4.34696e-05	4.64915e-08
577	4.04011e-05	4.64915e-08	540	4.34231e-05	4.64915e-08
582	4.03547e-05	4.64915e-08	541	4.33766e-05	1.39475e-07
584	4.03082e-05	4.64915e-08	542	4.32371e-05	4.64915e-08
586	4.02617e-05	4.64915e-08	544	4.31906e-05	4.64915e-08
590	4.02152e-05	4.64915e-08	545	4.31441e-05	4.64915e-08
592	4.01687e-05	4.64915e-08	546	4.30977e-05	4.64915e-08
594	4.01222e-05	4.64915e-08	547	4.30512e-05	9.29831e-08
597	4.00757e-05	9.29831e-08	548	4.29582e-05	9.29831e-08
600	3.99827e-05	4.64915e-08	552	4.28652e-05	9.29831e-08
605	3.99362e-05	9.29831e-08	554	4.27722e-05	4.64915e-08
612	3.98432e-05	4.64915e-08	555	4.27257e-05	1.39475e-07
617	3.97968e-05	9.29831e-08	557	4.25862e-05	9.29831e-08
618	3.97038e-05	4.64915e-08	560	4.24933e-05	4.64915e-08
619	3.96573e-05	9.29831e-08	562	4.24468e-05	1.39475e-07
620	3.95643e-05	4.64915e-08	563	4.23073e-05	2.32458e-07
621	3.95178e-05	9.29831e-08	564	4.20748e-05	3.71932e-07
623	3.94248e-05	4.64915e-08	565	4.17029e-05	1.85966e-07
624	3.93783e-05	4.64915e-08	566	4.15169e-05	1.39475e-07
625	3.93318e-05	4.64915e-08	567	4.13775e-05	1.85966e-07
628	3.92853e-05	4.64915e-08	568	4.11915e-05	5.11407e-07
629	3.92389e-05	9.29831e-08	569	4.06801e-05	3.71932e-07
630	3.91459e-05	9.29831e-08	570	4.03082e-05	5.11407e-07
631	3.90529e-05	4.64915e-08	571	3.97968e-05	4.64915e-08
632	3.90064e-05	1.85966e-07	572	3.97503e-05	4.64915e-08
636	3.88204e-05	9.29831e-08	581	3.97038e-05	4.64915e-08
637	3.87274e-05	1.39475e-07	585	3.96573e-05	4.64915e-08
638	3.8588e-05	1.39475e-07	587	3.96108e-05	9.29831e-08
639	3.84485e-05	4.64915e-08	591	3.95178e-05	4.64915e-08
641	3.8402e-05	9.29831e-08	593	3.94713e-05	4.64915e-08
644	3.8309e-05	9.29831e-08	614	3.94248e-05	4.64915e-08
646	3.8216e-05	2.32458e-07	616	3.93783e-05	9.29831e-08
647	3.79836e-05	9.29831e-08	624	3.92853e-05	4.64915e-08
648	3.78906e-05	9.29831e-08	626	3.92389e-05	9.29831e-08
649	3.77976e-05	1.39475e-07	630	3.91459e-05	4.64915e-08
650	3.76581e-05	9.29831e-08	646	3.90994e-05	4.64915e-08
652	3.75652e-05	9.29831e-08	648	3.90529e-05	4.64915e-08
653	3.74722e-05	2.78949e-07	651	3.90064e-05	4.64915e-08
655	3.71932e-05	4.18424e-07	653	3.89599e-05	4.64915e-08
656	3.67748e-05	4.64915e-08	655	3.89134e-05	4.64915e-08
657	3.67283e-05	4.64915e-08	661	3.88669e-05	4.64915e-08
659	3.66818e-05	6.50881e-07	664	3.88204e-05	4.64915e-08
660	3.60309e-05	9.29831e-08	669	3.87739e-05	4.64915e-08
661	3.5938e-05	4.64915e-08	670	3.87274e-05	4.64915e-08
662	3.58915e-05	4.64915e-08	672	3.8681e-05	4.64915e-08
665	3.5845e-05	4.64915e-08	682	3.86345e-05	4.64915e-08
667	3.57985e-05	9.29831e-08	690	3.8588e-05	4.64915e-08
672	3.57055e-05	9.29831e-08	704	3.85415e-05	4.64915e-08
678	3.56125e-05	4.64915e-08	706	3.8495e-05	4.64915e-08
679	3.5566e-05	4.64915e-08	710	3.84485e-05	9.29831e-08
682	3.55195e-05	4.64915e-08	718	3.83555e-05	4.64915e-08
684	3.5473e-05	4.64915e-08	720	3.8309e-05	4.64915e-08
685	3.54265e-05	4.64915e-08	722	3.82625e-05	4.64915e-08
687	3.53801e-05	4.64915e-08	723	3.8216e-05	4.64915e-08
692	3.53336e-05	9.29831e-08	726	3.81695e-05	4.64915e-08
694	3.52406e-05	4.64915e-08	730	3.81231e-05	9.29831e-08
695	3.51941e-05	4.64915e-08	733	3.80301e-05	4.64915e-08
696	3.51476e-05	4.18424e-07	738	3.79836e-05	4.64915e-08
697	3.47292e-05	4.64915e-08	739	3.79371e-05	4.64915e-08
699	3.46827e-05	4.64915e-08	745	3.78906e-05	4.64915e-08
705	3.46362e-05	4.64915e-08	746	3.78441e-05	4.64915e-08
709	3.45897e-05	4.64915e-08	749	3.77976e-05	9.29831e-08
711	3.45432e-05	2.32458e-07	750	3.77046e-05	4.64915e-08
712	3.43108e-05	9.29831e-08	753	3.76581e-05	4.64915e-08
717	3.42178e-05	4.64915e-08	754	3.76116e-05	4.64915e-08
724	3.41713e-05	9.29831e-08	755	3.75652e-05	4.64915e-08
730	3.40783e-05	4.64915e-08	756	3.75187e-05	4.64915e-08
731	3.40318e-05	4.64915e-08	758	3.74722e-05	4.64915e-08
732	3.39853e-05	4.64915e-08	759	3.74257e-05	9.76322e-07
735	3.39388e-05	4.64915e-08	760	3.64494e-05	7.43865e-07
741	3.38923e-05	4.64915e-08	761	3.57055e-05	4.64915e-08
744	3.38458e-05	9.29831e-08	768	3.5659e-05	4.64915e-08
746	3.37529e-05	4.64915e-08	769	3.56125e-05	4.64915e-08
750	3.37064e-05	4.64915e-08	778	3.5566e-05	4.64915e-08
752	3.36599e-05	4.64915e-08	781	3.55195e-05	4.64915e-08
753	3.36134e-05	4.64915e-08	782	3.5473e-05	9.29831e-08
756	3.35669e-05	4.64915e-08	789	3.53801e-05	4.64915e-08
757	3.35204e-05	4.64915e-08	791	3.53336e-05	4.64915e-08
758	3.34739e-05	9.29831e-08	796	3.52871e-05	4.64915e-08
760	3.33809e-05	4.64915e-08	798	3.52406e-05	4.64915e-08
761	3.33344e-05	4.64915e-08	803	3.51941e-05	4.64915e-08
769	3.32879e-05	2.32458e-07	813	3.51476e-05	4.64915e-08
774	3.30555e-05	1.39475e-07	821	3.51011e-05	2.32458e-07
775	3.2916e-05	1.39475e-07	822	3.48686e-05	9.29831e-08
776	3.27765e-05	6.50881e-07	823	3.47757e-05	1.85966e-07
777	3.21256e-05	3.71932e-07	824	3.45897e-05	9.29831e-08
778	3.17537e-05	3.71932e-07	825	3.44967e-05	4.64915e-08
779	3.13818e-05	4.64915e-08	827	3.44502e-05	1.85966e-07
780	3.13353e-05	9.29831e-08	828	3.42643e-05	9.29831e-08
781	3.12423e-05	4.64915e-08	829	3.41713e-05	9.29831e-08
782	3.11958e-05	4.64915e-08	831	3.40783e-05	4.64915e-08
786	3.11493e-05	9.29831e-08	832	3.40318e-05	9.29831e-08
788	3.10563e-05	4.64915e-08	834	3.39388e-05	9.29831e-08
789	3.10099e-05	4.64915e-08	835	3.38458e-05	4.64915e-08
791	3.09634e-05	9.29831e-08	837	3.37993e-05	4.64915e-08
792	3.08704e-05	1.85966e-07	838	3.37529e-05	4.64915e-08
794	3.06844e-05	9.29831e-08	839	3.37064e-05	9.29831e-08
795	3.05914e-05	4.64915e-08	840	3.36134e-05	4.64915e-08
797	3.05449e-05	4.64915e-08	843	3.35669e-05	9.29831e-08
798	3.04984e-05	4.64915e-08	844	3.34739e-05	4.64915e-08
800	3.0452e-05	9.29831e-08	845	3.34274e-05	4.64915e-08
801	3.0359e-05	4.64915e-08	846	3.33809e-05	4.64915e-08
802	3.03125e-05	4.64915e-08	847	3.33344e-05	9.29831e-08
804	3.0266e-05	9.29831e-08	848	3.32414e-05	4.64915e-08
806	3.0173e-05	4.64915e-08	849	3.3195e-05	4.64915e-08
807	3.01265e-05	4.64915e-08	855	3.31485e-05	4.64915e-08
808	3.008e-05	4.64915e-08	857	3.3102e-05	9.29831e-08
809	3.00335e-05	9.29831e-08	860	3.3009e-05	4.64915e-08
812	2.99405e-05	9.29831e-08	876	3.29625e-05	4.64915e-08
813	2.98476e-05	9.29831e-08	880	3.2916e-05	4.64915e-08
814	2.97546e-05	9.29831e-08	883	3.28695e-05	4.64915e-08
815	2.96616e-05	4.64915e-08	888	3.2823e-05	3.25441e-07
817	2.96151e-05	4.64915e-08	889	3.24976e-05	8.83339e-07
818	2.95686e-05	1.39475e-07	891	3.16142e-05	1.39475e-07
820	2.94291e-05	4.64915e-08	896	3.14748e-05	2.78949e-07
821	2.93826e-05	4.64915e-08	897	3.11958e-05	4.64915e-08
822	2.93362e-05	4.64915e-08	900	3.11493e-05	4.64915e-08
823	2.92897e-05	9.29831e-08	903	3.11028e-05	4.64915e-08
824	2.91967e-05	4.64915e-08	904	3.10563e-05	9.29831e-08
825	2.91502e-05	2.78949e-07	907	3.09634e-05	1.39475e-07
826	2.88712e-05	1.85966e-07	908	3.08239e-05	4.64915e-08
827	2.86853e-05	1.34825e-06	909	3.07774e-05	4.64915e-08
828	2.7337e-05	4.64915e-08	911	3.07309e-05	4.64915e-08
831	2.72905e-05	4.64915e-08	912	3.06844e-05	2.32458e-07
836	2.7244e-05	4.64915e-08	913	3.0452e-05	4.64915e-08
838	2.71975e-05	9.29831e-08	914	3.04055e-05	3.25441e-07
840	2.71046e-05	4.64915e-08	916	3.008e-05	4.64915e-08
863	2.70581e-05	4.64915e-08	917	3.00335e-05	2.32458e-07
869	2.70116e-05	4.64915e-08	919	2.98011e-05	9.29831e-08
875	2.69651e-05	4.64915e-08	923	2.97081e-05	4.64915e-08
878	2.69186e-05	4.64915e-08	925	2.96616e-05	3.71932e-07
891	2.68721e-05	4.64915e-08	926	2.92897e-05	9.29831e-08
900	2.68256e-05	4.64915e-08	927	2.91967e-05	9.29831e-08
902	2.67791e-05	9.29831e-08	928	2.91037e-05	4.64915e-08
903	2.66861e-05	1.1158e-06	929	2.90572e-05	4.64915e-08
905	2.55703e-05	4.64915e-08	942	2.90107e-05	4.64915e-08
906	2.55239e-05	4.64915e-08	945	2.89642e-05	4.64915e-08
907	2.54774e-05	9.29831e-08	950	2.89177e-05	4.64915e-08
908	2.53844e-05	4.64915e-08	953	2.88712e-05	4.64915e-08
911	2.53379e-05	4.64915e-08	959	2.88248e-05	4.64915e-08
933	2.52914e-05	4.64915e-08	960	2.87783e-05	9.29831e-08
938	2.52449e-05	4.64915e-08	962	2.86853e-05	1.85966e-07
947	2.51984e-05	4.64915e-08	964	2.84993e-05	1.39475e-07
952	2.51519e-05	4.64915e-08	965	2.83598e-05	4.64915e-08
960	2.51054e-05	4.64915e-08	971	2.83133e-05	4.64915e-08
964	2.50589e-05	9.29831e-08	981	2.82669e-05	4.64915e-08
972	2.4966e-05	4.64915e-08	982	2.82204e-05	4.64915e-08
982	2.49195e-05	4.64915e-08	983	2.81739e-05	4.64915e-08
997	2.4873e-05	4.64915e-08	984	2.81274e-05	4.64915e-08
1009	2.48265e-05	4.64915e-08	986	2.80809e-05	4.64915e-08
1015	2.478e-05	4.64915e-08	991	2.80344e-05	9.29831e-08
1024	2.47335e-05	4.64915e-08	992	2.79414e-05	2.32458e-07
1025	2.4687e-05	4.64915e-08	997	2.7709e-05	4.64915e-08
1029	2.46405e-05	4.64915e-08	998	2.76625e-05	4.64915e-08
1030	2.4594e-05	4.64915e-08	1004	2.7616e-05	9.29831e-08
1032	2.45475e-05	4.64915e-08	1012	2.7523e-05	4.64915e-08
1035	2.4501e-05	4.64915e-08	1020	2.74765e-05	9.29831e-08
1050	2.44545e-05	4.64915e-08	1031	2.73835e-05	4.64915e-08
1061	2.44081e-05	9.29831e-08	1032	2.7337e-05	4.64915e-08
1071	2.43151e-05	4.64915e-08	1038	2.72905e-05	4.64915e-08
1081	2.42686e-05	4.64915e-08	1042	2.7244e-05	9.29831e-08
1085	2.42221e-05	4.64915e-08	1049	2.71511e-05	4.64915e-08
1094	2.41756e-05	4.64915e-08	1053	2.71046e-05	4.64915e-08
1111	2.41291e-05	4.64915e-08	1060	2.70581e-05	4.64915e-08
1116	2.40826e-05	4.64915e-08	1065	2.70116e-05	2.78949e-07
1121	2.40361e-05	4.64915e-08	1067	2.67326e-05	4.64915e-07
1128	2.39896e-05	4.64915e-08	1068	2.62677e-05	4.18424e-07
1131	2.39431e-05	4.64915e-08	1069	2.58493e-05	9.29831e-08
1136	2.38966e-05	4.64915e-08	1070	2.57563e-05	9.29831e-08
1140	2.38502e-05	4.64915e-08	1071	2.56633e-05	4.64915e-08
1141	2.38037e-05	9.29831e-08	1078	2.56168e-05	4.64915e-08
1144	2.37107e-05	4.64915e-08	1088	2.55703e-05	9.29831e-08
1159	2.36642e-05	4.64915e-08	1091	2.54774e-05	4.64915e-08
1172	2.36177e-05	4.64915e-08	1094	2.54309e-05	4.64915e-08
1178	2.35712e-05	4.64915e-08	1099	2.53844e-05	4.64915e-08
1180	2.35247e-05	4.64915e-08	1121	2.53379e-05	4.64915e-08
1181	2.34782e-05	4.64915e-08	1125	2.52914e-05	4.64915e-08
1182	2.34317e-05	4.64915e-08	1129	2.52449e-05	4.64915e-08
1183	2.33852e-05	4.64915e-08	1130	2.51984e-05	4.64915e-08
1186	2.33387e-05	4.64915e-08	1133	2.51519e-05	4.64915e-08
1188	2.32923e-05	4.64915e-08	1146	2.51054e-05	4.64915e-08
1190	2.32458e-05	4.64915e-08	1150	2.50589e-05	4.64915e-08
1195	2.31993e-05	4.64915e-08	1162	2.50124e-05	4.64915e-08
1196	2.31528e-05	4.64915e-08	1166	2.4966e-05	4.64915e-08
1200	2.31063e-05	9.29831e-08	1186	2.49195e-05	4.64915e-08
1201	2.30133e-05	2.32458e-07	1202	2.4873e-05	4.64915e-08
1202	2.27809e-05	9.29831e-08	1213	2.48265e-05	4.64915e-08
1203	2.26879e-05	4.64915e-08	1218	2.478e-05	4.64915e-08
1204	2.26414e-05	4.64915e-08	1226	2.47335e-05	4.64915e-08
1205	2.25949e-05	4.64915e-08	1239	2.4687e-05	4.64915e-08
1209	2.25484e-05	4.64915e-08	1241	2.46405e-05	4.64915e-08
1215	2.25019e-05	4.64915e-08	1249	2.4594e-05	4.64915e-08
1228	2.24554e-05	9.29831e-08	1261	2.45475e-05	4.64915e-08
1238	2.23624e-05	4.64915e-08	1272	2.4501e-05	4.64915e-08
1240	2.23159e-05	4.64915e-08	1281	2.44545e-05	4.64915e-08
1249	2.22694e-05	4.64915e-08	1289	2.44081e-05	4.64915e-08
1256	2.2223e-05	4.64915e-08	1297	2.43616e-05	4.64915e-08
1273	2.21765e-05	4.64915e-08	1304	2.43151e-05	4.64915e-08
1279	2.213e-05	4.64915e-08	1306	2.42686e-05	4.64915e-08
1285	2.20835e-05	4.64915e-08	1321	2.42221e-05	4.64915e-08
1306	2.2037e-05	4.64915e-08	1325	2.41756e-05	4.64915e-08
1324	2.19905e-05	4.64915e-08	1328	2.41291e-05	4.64915e-08
1326	2.1944e-05	4.64915e-08	1333	2.40826e-05	4.64915e-08
1338	2.18975e-05	4.64915e-08	1337	2.40361e-05	4.64915e-08
1372	2.1851e-05	4.64915e-08	1344	2.39896e-05	4.64915e-08
1376	2.18045e-05	4.64915e-08	1385	2.39431e-05	4.64915e-08
1377	2.1758e-05	4.64915e-08	1387	2.38966e-05	4.64915e-08
1380	2.17115e-05	4.64915e-08	1388	2.38502e-05	4.64915e-08
1391	2.16651e-05	4.64915e-08	1390	2.38037e-05	4.64915e-08
1393	2.16186e-05	4.64915e-08	1397	2.37572e-05	4.64915e-08
1397	2.15721e-05	4.64915e-08	1429	2.37107e-05	4.64915e-08
1407	2.15256e-05	4.64915e-08	1433	2.36642e-05	4.64915e-08
1408	2.14791e-05	4.64915e-08	1440	2.36177e-05	4.64915e-08
1409	2.14326e-05	4.64915e-08	1443	2.35712e-05	9.29831e-08
1430	2.13861e-05	4.64915e-08	1444	2.34782e-05	4.64915e-08
1432	2.13396e-05	4.64915e-08	1449	2.34317e-05	4.64915e-08
1433	2.12931e-05	4.64915e-08	1455	2.33852e-05	4.64915e-08
1478	2.12466e-05	4.64915e-08	1456	2.33387e-05	4.64915e-08
1481	2.12001e-05	4.64915e-08	1482	2.32923e-05	4.64915e-08
1499	2.11536e-05	4.64915e-08	1488	2.32458e-05	4.64915e-08
1505	2.11072e-05	4.64915e-08	1490	2.31993e-05	4.64915e-08
1514	2.10607e-05	4.64915e-08	1496	2.31528e-05	4.64915e-08
1525	2.10142e-05	9.29831e-08	1498	2.31063e-05	4.64915e-08
1526	2.09212e-05	4.64915e-08	1503	2.30598e-05	4.64915e-08
1532	2.08747e-05	9.29831e-08	1519	2.30133e-05	4.64915e-08
1535	2.07817e-05	4.64915e-08	1525	2.29668e-05	4.64915e-08
1536	2.07352e-05	4.64915e-08	1532	2.29203e-05	4.64915e-08
1543	2.06887e-05	4.64915e-08	1537	2.28738e-05	4.64915e-08
1570	2.06422e-05	4.64915e-08	1547	2.28273e-05	4.64915e-08
1585	2.05957e-05	4.64915e-08	1574	2.27809e-05	4.64915e-08
1590	2.05493e-05	4.64915e-08	1580	2.27344e-05	4.64915e-08
1608	2.05028e-05	4.64915e-08	1586	2.26879e-05	4.64915e-08
1610	2.04563e-05	9.29831e-08	1588	2.26414e-05	4.64915e-08
1629	2.03633e-05	4.64915e-08	1598	2.25949e-05	4.64915e-08
1630	2.03168e-05	4.64915e-08	1602	2.25484e-05	9.29831e-08
1631	2.02703e-05	4.64915e-08	1603	2.24554e-05	4.64915e-08
1635	2.02238e-05	4.64915e-08	1604	2.24089e-05	4.64915e-08
1640	2.01773e-05	4.64915e-08	1605	2.23624e-05	4.64915e-08
1650	2.01308e-05	4.64915e-08	1610	2.23159e-05	4.64915e-08
1652	2.00843e-05	4.64915e-08	1617	2.22694e-05	1.85966e-07
1656	2.00379e-05	4.64915e-08	1624	2.20835e-05	2.78949e-07
1663	1.99914e-05	4.64915e-08	1625	2.18045e-05	4.64915e-08
1671	1.99449e-05	4.64915e-08	1631	2.1758e-05	4.64915e-08
1682	1.98984e-05	4.64915e-08	1635	2.17115e-05	4.64915e-08
1703	1.98519e-05	4.64915e-08	1638	2.16651e-05	4.64915e-08
1711	1.98054e-05	4.64915e-08	1640	2.16186e-05	4.64915e-08
1724	1.97589e-05	4.64915e-08	1641	2.15721e-05	4.64915e-08
1731	1.97124e-05	4.64915e-08	1680	2.15256e-05	4.64915e-08
1744	1.96659e-05	4.64915e-08	1685	2.14791e-05	4.64915e-08
1750	1.96194e-05	4.64915e-08	1699	2.14326e-05	4.64915e-08
1754	1.95729e-05	4.64915e-08	1704	2.13861e-05	4.64915e-08
1755	1.95264e-05	4.64915e-08	1732	2.13396e-05	4.64915e-08
1760	1.948e-05	4.64915e-08	1734	2.12931e-05	4.64915e-08
1764	1.94335e-05	4.64915e-08	1745	2.12466e-05	4.64915e-08
1770	1.9387e-05	9.29831e-08	1760	2.12001e-05	4.64915e-08
1775	1.9294e-05	4.64915e-08	1790	2.11536e-05	4.64915e-08
1785	1.92475e-05	9.29831e-08	1794	2.11072e-05	4.64915e-08
1798	1.91545e-05	4.64915e-08	1799	2.10607e-05	4.64915e-08
1799	1.9108e-05	4.64915e-08	1818	2.10142e-05	4.64915e-08
1801	1.90615e-05	4.64915e-08	1819	2.09677e-05	4.64915e-08
1810	1.9015e-05	4.64915e-08	1828	2.09212e-05	4.64915e-08
1813	1.89685e-05	4.64915e-08	1839	2.08747e-05	4.64915e-08
1829	1.89221e-05	4.64915e-08	1855	2.08282e-05	4.64915e-08
1846	1.88756e-05	4.64915e-08	1862	2.07817e-05	4.64915e-08
1848	1.88291e-05	4.64915e-08	1870	2.07352e-05	4.64915e-08
1855	1.87826e-05	4.64915e-08	1920	2.06887e-05	4.64915e-08
1875	1.87361e-05	4.64915e-08	1922	2.06422e-05	4.64915e-08
1876	1.86896e-05	4.64915e-08	1930	2.05957e-05	4.64915e-08
1890	1.86431e-05	4.64915e-08	1932	2.05493e-05	4.64915e-08
1911	1.85966e-05	4.64915e-08	1938	2.05028e-05	4.64915e-08
1913	1.85501e-05	4.64915e-08	1945	2.04563e-05	4.64915e-08
1920	1.85036e-05	4.64915e-08	1968	2.04098e-05	4.64915e-08
1926	1.84571e-05	4.64915e-08	1989	2.03633e-05	4.64915e-08
1929	1.84106e-05	4.64915e-08	2002	2.03168e-05	4.64915e-08
1962	1.83642e-05	4.64915e-08	2008	2.02703e-05	4.64915e-08
1970	1.83177e-05	4.64915e-08	2036	2.02238e-05	4.64915e-08
1974	1.82712e-05	4.64915e-08	2061	2.01773e-05	4.64915e-08
2001	1.82247e-05	4.64915e-08	2066	2.01308e-05	4.64915e-08
2009	1.81782e-05	4.64915e-08	2076	2.00843e-05	4.64915e-08
2013	1.81317e-05	4.64915e-08	2081	2.00379e-05	4.64915e-08
2015	1.80852e-05	4.64915e-08	2097	1.99914e-05	4.64915e-08
2016	1.80387e-05	4.64915e-08	2126	1.99449e-05	4.64915e-08
2022	1.79922e-05	4.64915e-08	2139	1.98984e-05	4.64915e-08
2024	1.79457e-05	4.64915e-08	2148	1.98519e-05	4.64915e-08
2025	1.78992e-05	4.64915e-08	2164	1.98054e-05	4.64915e-08
2027	1.78527e-05	1.34825e-06	2171	1.97589e-05	4.64915e-08
2028	1.65045e-05	4.64915e-08	2181	1.97124e-05	4.64915e-08
2034	1.6458e-05	4.64915e-08	2190	1.96659e-05	4.64915e-08
2050	1.64115e-05	4.64915e-08	2198	1.96194e-05	4.64915e-08
2067	1.6365e-05	4.64915e-08	2217	1.95729e-05	4.64915e-08
2070	1.63185e-05	4.64915e-08	2220	1.95264e-05	4.64915e-08
2074	1.6272e-05	4.64915e-08	2224	1.948e-05	4.64915e-08
2101	1.62255e-05	4.64915e-08	2228	1.94335e-05	4.64915e-08
2115	1.61791e-05	4.64915e-08	2230	1.9387e-05	4.64915e-08
2131	1.61326e-05	4.64915e-08	2236	1.93405e-05	4.64915e-08
2133	1.60861e-05	4.64915e-08	2238	1.9294e-05	4.64915e-08
2135	1.60396e-05	4.64915e-08	2244	1.92475e-05	4.64915e-08
2157	1.59931e-05	4.64915e-08	2253	1.9201e-05	4.64915e-08
2165	1.59466e-05	4.64915e-08	2277	1.91545e-05	4.64915e-08
2172	1.59001e-05	4.64915e-08	2294	1.9108e-05	4.64915e-08
2177	1.58536e-05	4.64915e-08	2302	1.90615e-05	4.64915e-08
2221	1.58071e-05	4.64915e-08	2318	1.9015e-05	4.64915e-08
2224	1.57606e-05	4.64915e-08	2323	1.89685e-05	4.64915e-08
2234	1.57141e-05	4.64915e-08	2334	1.89221e-05	4.64915e-08
2247	1.56676e-05	4.64915e-08	2345	1.88756e-05	4.64915e-08
2270	1.56212e-05	4.64915e-08	2351	1.88291e-05	4.64915e-08
2285	1.55747e-05	4.64915e-08	2358	1.87826e-05	4.64915e-08
2300	1.55282e-05	4.64915e-08	2376	1.87361e-05	4.64915e-08
2305	1.54817e-05	4.64915e-08	2387	1.86896e-05	4.64915e-08
2321	1.54352e-05	4.64915e-08	2389	1.86431e-05	4.64915e-08
2345	1.53887e-05	4.64915e-08	2406	1.85966e-05	4.64915e-08
2348	1.53422e-05	4.64915e-08	2423	1.85501e-05	4.64915e-08
2356	1.52957e-05	9.29831e-08	2425	1.85036e-05	4.64915e-08
2360	1.52027e-05	4.64915e-08	2426	1.84571e-05	4.64915e-08
2375	1.51562e-05	4.64915e-08	2441	1.84106e-05	4.64915e-08
2393	1.51097e-05	4.64915e-08	2451	1.83642e-05	4.64915e-08
2400	1.50633e-05	4.64915e-08	2462	1.83177e-05	4.64915e-08
2403	1.50168e-05	4.64915e-08	2481	1.82712e-05	4.64915e-08
2426	1.49703e-05	4.64915e-08	2482	1.82247e-05	4.64915e-08
2428	1.49238e-05	4.64915e-08	2484	1.81782e-05	4.64915e-08
2437	1.48773e-05	4.64915e-08	2500	1.81317e-05	4.64915e-08
2443	1.48308e-05	4.64915e-08	2501	1.80852e-05	4.64915e-08
2446	1.47843e-05	4.64915e-08	2512	1.80387e-05	4.64915e-08
2450	1.47378e-05	4.64915e-08	2538	1.79922e-05	4.64915e-08
2475	1.46913e-05	4.64915e-08	2542	1.79457e-05	4.64915e-08
2498	1.46448e-05	4.64915e-08	2550	1.78992e-05	4.64915e-08
2503	1.45983e-05	4.64915e-08	2553	1.78527e-05	4.64915e-08
2506	1.45518e-05	4.64915e-08	2563	1.78063e-05	4.64915e-08
2528	1.45054e-05	9.29831e-08	2573	1.77598e-05	4.64915e-08
2532	1.44124e-05	4.64915e-08	2605	1.77133e-05	4.64915e-08
2533	1.43659e-05	4.64915e-08	2616	1.76668e-05	4.64915e-08
2555	1.43194e-05	4.64915e-08	2630	1.76203e-05	4.64915e-08
2562	1.42729e-05	4.64915e-08	2636	1.75738e-05	4.64915e-08
2571	1.42264e-05	4.64915e-08	2664	1.75273e-05	4.64915e-08
2581	1.41799e-05	4.64915e-08	2684	1.74808e-05	4.64915e-08
2588	1.41334e-05	4.64915e-08	2692	1.74343e-05	4.64915e-08
2600	1.40869e-05	4.64915e-08	2717	1.73878e-05	4.64915e-08
2605	1.40404e-05	4.64915e-08	2727	1.73413e-05	4.64915e-08
2616	1.3994e-05	4.64915e-08	2730	1.72949e-05	4.64915e-08
2619	1.39475e-05	4.64915e-08	2736	1.72484e-05	4.64915e-08
2629	1.3901e-05	4.64915e-08	2742	1.72019e-05	4.64915e-08
2649	1.38545e-05	4.64915e-08	2750	1.71554e-05	4.64915e-08
2652	1.3808e-05	4.64915e-08	2754	1.71089e-05	4.64915e-08
2668	1.37615e-05	4.64915e-08	2792	1.70624e-05	4.64915e-08
2698	1.3715e-05	4.64915e-08	2796	1.70159e-05	1.39475e-07
2703	1.36685e-05	1.85966e-07	2807	1.68764e-05	4.64915e-08
2705	1.34825e-05	4.64915e-08	2808	1.68299e-05	4.64915e-08
2714	1.34361e-05	4.64915e-08	2814	1.67834e-05	4.64915e-08
2726	1.33896e-05	4.64915e-08	2817	1.6737e-05	4.64915e-08
2782	1.33431e-05	4.64915e-08	2821	1.66905e-05	4.64915e-08
2825	1.32966e-05	4.64915e-08	2826	1.6644e-05	4.64915e-08
2840	1.32501e-05	4.64915e-08	2832	1.65975e-05	1.34825e-06
2842	1.32036e-05	4.64915e-08	2833	1.52492e-05	4.64915e-08
2844	1.31571e-05	4.64915e-08	2845	1.52027e-05	4.64915e-08
2894	1.31106e-05	4.64915e-08	2886	1.51562e-05	4.64915e-08
2902	1.30641e-05	4.64915e-08	2888	1.51097e-05	4.64915e-08
2947	1.30176e-05	4.64915e-08	2896	1.50633e-05	4.64915e-08
2968	1.29711e-05	4.64915e-08	2912	1.50168e-05	4.64915e-08
2973	1.29246e-05	4.64915e-08	2917	1.49703e-05	4.64915e-08
2975	1.28782e-05	4.64915e-08	2921	1.49238e-05	4.64915e-08
2995	1.28317e-05	4.64915e-08	2949	1.48773e-05	4.64915e-08
3038	1.27852e-05	4.64915e-08	2997	1.48308e-05	4.64915e-08
3040	1.27387e-05	4.64915e-08	3008	1.47843e-05	4.64915e-08
3065	1.26922e-05	4.64915e-08	3032	1.47378e-05	4.64915e-08
3072	1.26457e-05	4.64915e-08	3037	1.46913e-05	9.29831e-08
3088	1.25992e-05	4.64915e-08	3042	1.45983e-05	4.64915e-08
3094	1.25527e-05	4.64915e-08	3072	1.45518e-05	4.64915e-08
3119	1.25062e-05	4.64915e-08	3113	1.45054e-05	4.64915e-08
3123	1.24597e-05	4.64915e-08	3142	1.44589e-05	4.64915e-08
3133	1.24132e-05	4.64915e-08	3148	1.44124e-05	4.64915e-08
3140	1.23667e-05	4.64915e-08	3180	1.43659e-05	4.64915e-08
3155	1.23203e-05	9.29831e-08	3191	1.43194e-05	4.64915e-08
3166	1.22273e-05	4.64915e-08	3214	1.42729e-05	4.64915e-08
3168	1.21808e-05	4.64915e-08	3220	1.42264e-05	4.64915e-08
3190	1.21343e-05	4.64915e-08	3247	1.41799e-05	4.64915e-08
3196	1.20878e-05	4.64915e-08	3248	1.41334e-05	4.64915e-08
3205	1.20413e-05	4.64915e-08	3260	1.40869e-05	4.64915e-08
3207	1.19948e-05	4.64915e-08	3269	1.40404e-05	4.64915e-08
3219	1.19483e-05	4.64915e-08	3270	1.3994e-05	4.64915e-08
3222	1.19018e-05	4.64915e-08	3293	1.39475e-05	4.64915e-08
3231	1.18553e-05	4.64915e-08	3307	1.3901e-05	4.64915e-08
3237	1.18088e-05	4.64915e-08	3317	1.38545e-05	4.64915e-08
3243	1.17624e-05	4.64915e-08	3346	1.3808e-05	4.64915e-08
3249	1.17159e-05	9.29831e-08	3362	1.37615e-05	4.64915e-08
3250	1.16229e-05	4.64915e-08	3387	1.3715e-05	4.64915e-08
3251	1.15764e-05	9.29831e-08	3389	1.36685e-05	4.64915e-08
3253	1.14834e-05	4.64915e-08	3391	1.3622e-05	4.64915e-08
3254	1.14369e-05	9.29831e-08	3421	1.35755e-05	9.29831e-08
3255	1.13439e-05	4.64915e-08	3450	1.34825e-05	4.64915e-08
3300	1.12974e-05	4.64915e-08	3459	1.34361e-05	4.64915e-08
3320	1.1251e-05	4.64915e-08	3471	1.33896e-05	4.64915e-08
3378	1.12045e-05	4.64915e-08	3490	1.33431e-05	4.64915e-08
3427	1.1158e-05	4.64915e-08	3517	1.32966e-05	9.29831e-08
3450	1.11115e-05	4.64915e-08	3522	1.32036e-05	4.64915e-08
3533	1.1065e-05	4.64915e-08	3524	1.31571e-05	4.64915e-08
3559	1.10185e-05	4.64915e-08	3552	1.31106e-05	4.64915e-08
3642	1.0972e-05	4.64915e-08	3574	1.30641e-05	4.64915e-08
3689	1.09255e-05	4.64915e-08	3627	1.30176e-05	4.64915e-08
3701	1.0879e-05	4.64915e-08	3636	1.29711e-05	4.64915e-08
3774	1.08325e-05	4.64915e-08	3654	1.29246e-05	4.64915e-08
3787	1.0786e-05	4.64915e-08	3658	1.28782e-05	1.85966e-07
3802	1.07395e-05	4.64915e-08	3666	1.26922e-05	4.64915e-08
3878	1.06931e-05	4.64915e-08	3683	1.26457e-05	4.64915e-08
3984	1.06466e-05	4.64915e-08	3716	1.25992e-05	4.64915e-08
3995	1.06001e-05	4.64915e-08	3728	1.25527e-05	4.64915e-08
4083	1.05536e-05	4.64915e-08	3732	1.25062e-05	4.64915e-08
4194	1.05071e-05	4.64915e-08	3737	1.24597e-05	4.64915e-08
4238	1.04606e-05	4.64915e-08	3776	1.24132e-05	4.64915e-08
4244	1.04141e-05	9.29831e-08	3811	1.23667e-05	4.64915e-08
4258	1.03211e-05	4.64915e-08	3836	1.23203e-05	4.64915e-08
4298	1.02746e-05	4.64915e-08	3862	1.22738e-05	4.64915e-08
4334	1.02281e-05	4.64915e-08	3874	1.22273e-05	4.64915e-08
4368	1.01816e-05	4.64915e-08	3921	1.21808e-05	4.64915e-08
4386	1.01352e-05	4.64915e-08	3936	1.21343e-05	4.64915e-08
4436	1.00887e-05	4.64915e-08	3940	1.20878e-05	4.64915e-08
4495	1.00422e-05	4.64915e-08	3996	1.20413e-05	4.64915e-08
4528	9.99568e-06	4.64915e-08	4000	1.19948e-05	4.64915e-08
4589	9.94919e-06	4.64915e-08	4004	1.19483e-05	4.64915e-08
4597	9.9027e-06	4.64915e-08	4035	1.19018e-05	4.64915e-08
4666	9.8562e-06	4.64915e-08	4073	1.18553e-05	4.64915e-08
4682	9.80971e-06	4.64915e-08	4099	1.18088e-05	4.64915e-08
4748	9.76322e-06	4.64915e-08	4116	1.17624e-05	4.64915e-08
4778	9.71673e-06	4.64915e-08	4153	1.17159e-05	4.64915e-08
4782	9.67024e-06	4.64915e-08	4214	1.16694e-05	4.64915e-08
4825	9.62375e-06	4.64915e-08	4230	1.16229e-05	4.64915e-08
4845	9.57726e-06	4.64915e-08	4250	1.15764e-05	4.64915e-08
4865	9.53076e-06	4.64915e-08	4273	1.15299e-05	4.64915e-08
4880	9.48427e-06	4.64915e-08	4302	1.14834e-05	4.64915e-08
4921	9.43778e-06	4.64915e-08	4304	1.14369e-05	9.29831e-08
4925	9.39129e-06	4.64915e-08	4319	1.13439e-05	4.64915e-08
4958	9.3448e-06	4.64915e-08	4335	1.12974e-05	4.64915e-08
4997	9.29831e-06	4.64915e-08	4344	1.1251e-05	4.64915e-08
5005	9.25181e-06	4.64915e-08	4345	1.12045e-05	4.64915e-08
5036	9.20532e-06	4.64915e-08	4356	1.1158e-05	4.64915e-08
5062	9.15883e-06	4.64915e-08	4383	1.11115e-05	4.64915e-08
5099	9.11234e-06	4.64915e-08	4393	1.1065e-05	4.64915e-08
5100	9.06585e-06	4.64915e-08	4415	1.10185e-05	4.64915e-08
5119	9.01936e-06	4.64915e-08	4421	1.0972e-05	4.64915e-08
5120	8.97287e-06	4.64915e-08	4441	1.09255e-05	4.64915e-08
5123	8.92637e-06	4.64915e-08	4446	1.0879e-05	4.64915e-08
5133	8.87988e-06	4.64915e-08	4455	1.08325e-05	4.64915e-08
5134	8.83339e-06	4.64915e-08	4460	1.0786e-05	4.64915e-08
5142	8.7869e-06	4.64915e-08	4461	1.07395e-05	4.64915e-08
5150	8.74041e-06	4.64915e-08	4463	1.06931e-05	4.64915e-08
5153	8.69392e-06	4.64915e-08	4465	1.06466e-05	4.64915e-08
5163	8.64743e-06	4.64915e-08	4469	1.06001e-05	9.29831e-08
5185	8.60093e-06	4.64915e-08	4471	1.05071e-05	4.64915e-08
5198	8.55444e-06	4.64915e-08	4472	1.04606e-05	4.64915e-08
5203	8.50795e-06	4.64915e-08	4551	1.04141e-05	4.64915e-08
5271	8.46146e-06	4.64915e-08	4607	1.03676e-05	4.64915e-08
5528	8.41497e-06	4.64915e-08	4618	1.03211e-05	4.64915e-08
5663	8.36848e-06	4.64915e-08	4633	1.02746e-05	4.64915e-08
5805	8.32198e-06	4.64915e-08	4669	1.02281e-05	4.64915e-08
5978	8.27549e-06	4.64915e-08	4718	1.01816e-05	4.64915e-08
6077	8.229e-06	4.64915e-08	4807	1.01352e-05	4.64915e-08
6316	8.18251e-06	4.64915e-08	4809	1.00887e-05	4.64915e-08
6519	8.13602e-06	4.64915e-08	4894	1.00422e-05	4.64915e-08
6798	8.08953e-06	4.64915e-08	4936	9.99568e-06	4.64915e-08
6946	8.04304e-06	4.64915e-08	4941	9.94919e-06	4.64915e-08
7106	7.99654e-06	4.64915e-08	4991	9.9027e-06	4.64915e-08
7377	7.95005e-06	4.64915e-08	5012	9.8562e-06	4.64915e-08
7579	7.90356e-06	4.64915e-08	5032	9.80971e-06	4.64915e-08
7597	7.85707e-06	4.64915e-08	5083	9.76322e-06	4.64915e-08
7739	7.81058e-06	4.64915e-08	5110	9.71673e-06	4.64915e-08
7844	7.76409e-06	4.64915e-08	5119	9.67024e-06	4.64915e-08
7853	7.71759e-06	4.64915e-08	5129	9.62375e-06	4.64915e-08
8369	7.6711e-06	4.64915e-08	5193	9.57726e-06	4.64915e-08
8482	7.62461e-06	4.64915e-08	5216	9.53076e-06	4.64915e-08
8708	7.57812e-06	4.64915e-08	5300	9.48427e-06	4.64915e-08
8729	7.53163e-06	4.64915e-08	5301	9.43778e-06	4.64915e-08
9156	7.48514e-06	4.64915e-08	5373	9.39129e-06	4.64915e-08
9281	7.43865e-06	4.64915e-08	5412	9.3448e-06	4.64915e-08
9556	7.39215e-06	4.64915e-08	5434	9.29831e-06	4.64915e-08
9586	7.34566e-06	4.64915e-08	5502	9.25181e-06	4.64915e-08
9758	7.29917e-06	4.64915e-08	5513	9.20532e-06	4.64915e-08
9835	7.25268e-06	4.64915e-08	5553	9.15883e-06	4.64915e-08
10145	7.20619e-06	4.64915e-08	5591	9.11234e-06	4.64915e-08
10384	7.1597e-06	4.64915e-08	5608	9.06585e-06	4.64915e-08
10449	7.1132e-06	4.64915e-08	5617	9.01936e-06	4.64915e-08
10749	7.06671e-06	4.64915e-08	5641	8.97287e-06	4.64915e-08
10900	7.02022e-06	4.64915e-08	5663	8.92637e-06	4.64915e-08
10913	6.97373e-06	4.64915e-08	5681	8.87988e-06	4.64915e-08
11017	6.92724e-06	4.64915e-08	5682	8.83339e-06	4.64915e-08
11120	6.88075e-06	4.64915e-08	5687	8.7869e-06	4.64915e-08
11162	6.83426e-06	4.64915e-08	5701	8.74041e-06	4.64915e-08
11437	6.78776e-06	4.64915e-08	5712	8.69392e-06	4.64915e-08
11704	6.74127e-06	4.64915e-08	5753	8.64743e-06	4.64915e-08
11791	6.69478e-06	4.64915e-08	5768	8.60093e-06	4.64915e-08
11856	6.64829e-06	4.64915e-08	5796	8.55444e-06	4.64915e-08
12251	6.6018e-06	4.64915e-08	5800	8.50795e-06	4.64915e-08
12387	6.55531e-06	4.64915e-08	5823	8.46146e-06	4.64915e-08
12416	6.50881e-06	4.64915e-08	5855	8.41497e-06	4.64915e-08
12595	6.46232e-06	4.64915e-08	5862	8.36848e-06	4.64915e-08
12708	6.41583e-06	4.64915e-08	5874	8.32198e-06	4.64915e-08
12914	6.36934e-06	4.64915e-08	5877	8.27549e-06	4.64915e-08
12972	6.32285e-06	4.64915e-08	5889	8.229e-06	4.64915e-08
13056	6.27636e-06	4.64915e-08	5900	8.18251e-06	4.64915e-08
13280	6.22987e-06	4.64915e-08	6058	8.13602e-06	4.64915e-08
13487	6.18337e-06	4.64915e-08	6360	8.08953e-06	4.64915e-08
13732	6.13688e-06	4.64915e-08	6496	8.04304e-06	4.64915e-08
13880	6.09039e-06	4.64915e-08	6530	7.99654e-06	4.64915e-08
13886	6.0439e-06	4.64915e-08	6579	7.95005e-06	4.64915e-08
13979	5.99741e-06	4.64915e-08	6921	7.90356e-06	4.64915e-08
14045	5.95092e-06	4.64915e-08	6953	7.85707e-06	4.64915e-08
14252	5.90442e-06	4.64915e-08	7119	7.81058e-06	4.64915e-08
14384	5.85793e-06	4.64915e-08	7202	7.76409e-06	4.64915e-08
14434	5.81144e-06	4.64915e-08	7348	7.71759e-06	4.64915e-08
14490	5.76495e-06	4.64915e-08	7608	7.6711e-06	4.64915e-08
14548	5.71846e-06	4.64915e-08	7798	7.62461e-06	4.64915e-08
14571	5.67197e-06	4.64915e-08	8156	7.57812e-06	4.64915e-08
14641	5.62548e-06	4.64915e-08	8158	7.53163e-06	4.64915e-08
14643	5.57898e-06	4.64915e-08	8185	7.48514e-06	4.64915e-08
14650	5.53249e-06	4.64915e-08	8494	7.43865e-06	4.64915e-08
14654	5.486e-06	4.64915e-08	8505	7.39215e-06	4.64915e-08
14659	5.43951e-06	4.64915e-08	8974	7.34566e-06	4.64915e-08
14663	5.39302e-06	4.64915e-08	8980	7.29917e-06	4.64915e-08
14665	5.34653e-06	1.39475e-07	9079	7.25268e-06	4.64915e-08
14666	5.20705e-06	1.85966e-07	9274	7.20619e-06	4.64915e-08
14668	5.02109e-06	9.29831e-08	9330	7.1597e-06	4.64915e-08
14669	4.9281e-06	9.29831e-08	9696	7.1132e-06	4.64915e-08
14671	4.83512e-06	9.29831e-08	9763	7.06671e-06	4.64915e-08
14672	4.74214e-06	1.85966e-07	9772	7.02022e-06	4.64915e-08
14674	4.55617e-06	4.64915e-08	10032	6.97373e-06	4.64915e-08
14891	4.50968e-06	4.64915e-08	10133	6.92724e-06	4.64915e-08
15582	4.46319e-06	4.64915e-08	10249	6.88075e-06	4.64915e-08
15685	4.4167e-06	4.64915e-08	10316	6.83426e-06	4.64915e-08
15730	4.3702e-06	4.64915e-08	10388	6.78776e-06	4.64915e-08
15881	4.32371e-06	4.64915e-08	10562	6.74127e-06	4.64915e-08
16490	4.27722e-06	4.64915e-08	10667	6.69478e-06	4.64915e-08
16548	4.23073e-06	4.64915e-08	10899	6.64829e-06	4.64915e-08
17354	4.18424e-06	4.64915e-08	11157	6.6018e-06	4.64915e-08
17498	4.13775e-06	4.64915e-08	11321	6.55531e-06	4.64915e-08
17606	4.09125e-06	4.64915e-08	11465	6.50881e-06	4.64915e-08
17671	4.04476e-06	4.64915e-08	11482	6.46232e-06	4.64915e-08
18300	3.99827e-06	4.64915e-08	11529	6.41583e-06	4.64915e-08
18562	3.95178e-06	4.64915e-08	11871	6.36934e-06	4.64915e-08
18943	3.90529e-06	4.64915e-08	11875	6.32285e-06	4.64915e-08
19152	3.8588e-06	4.64915e-08	12029	6.27636e-06	4.64915e-08
19317	3.81231e-06	4.64915e-08	12085	6.22987e-06	4.64915e-08
19627	3.76581e-06	4.64915e-08	12180	6.18337e-06	4.64915e-08
20181	3.71932e-06	4.64915e-08	12396	6.13688e-06	4.64915e-08
20429	3.67283e-06	4.64915e-08	12541	6.09039e-06	4.64915e-08
20980	3.62634e-06	4.64915e-08	12553	6.0439e-06	4.64915e-08
21162	3.57985e-06	4.64915e-08	12967	5.99741e-06	4.64915e-08
21609	3.53336e-06	4.64915e-08	12977	5.95092e-06	4.64915e-08
21865	3.48686e-06	4.64915e-08	13051	5.90442e-06	4.64915e-08
22163	3.44037e-06	4.64915e-08	13063	5.85793e-06	4.64915e-08
22503	3.39388e-06	4.64915e-08	13419	5.81144e-06	4.64915e-08
22664	3.34739e-06	4.64915e-08	13423	5.76495e-06	4.64915e-08
23495	3.3009e-06	4.64915e-08	13454	5.71846e-06	4.64915e-08
23657	3.25441e-06	4.64915e-08	13499	5.67197e-06	4.64915e-08
23789	3.20792e-06	4.64915e-08	13550	5.62548e-06	4.64915e-08
23799	3.16142e-06	4.64915e-08	13637	5.57898e-06	4.64915e-08
24753	3.11493e-06	4.64915e-08	13653	5.53249e-06	9.29831e-08
25074	3.06844e-06	4.64915e-08	13657	5.43951e-06	4.64915e-08
25204	3.02195e-06	4.64915e-08	13663	5.39302e-06	4.64915e-08
25218	2.97546e-06	4.64915e-08	13672	5.34653e-06	4.64915e-08
26225	2.92897e-06	4.64915e-08	13677	5.30003e-06	4.64915e-08
26421	2.88248e-06	4.64915e-08	13683	5.25354e-06	2.32458e-07
26489	2.83598e-06	4.64915e-08	13687	5.02109e-06	3.25441e-07
26881	2.78949e-06	4.64915e-08	13688	4.69564e-06	4.64915e-08
26905	2.743e-06	4.64915e-08	13690	4.64915e-06	1.39475e-07
27628	2.69651e-06	4.64915e-08	13691	4.50968e-06	9.29831e-08
27681	2.65002e-06	4.64915e-08	13692	4.4167e-06	4.64915e-08
28224	2.60353e-06	4.64915e-08	14187	4.3702e-06	4.64915e-08
28254	2.55703e-06	4.64915e-08	14351	4.32371e-06	4.64915e-08
28322	2.51054e-06	4.64915e-08	14685	4.27722e-06	4.64915e-08
28359	2.46405e-06	4.64915e-08	15192	4.23073e-06	4.64915e-08
28388	2.41756e-06	4.64915e-08	15278	4.18424e-06	4.64915e-08
28500	2.37107e-06	4.64915e-08	15375	4.13775e-06	4.64915e-08
28657	2.32458e-06	4.64915e-08	15736	4.09125e-06	4.64915e-08
28827	2.27809e-06	4.64915e-08	16178	4.04476e-06	4.64915e-08
28892	2.23159e-06	4.64915e-08	16325	3.99827e-06	4.64915e-08
28931	2.1851e-06	4.64915e-08	16534	3.95178e-06	4.64915e-08
29031	2.13861e-06	4.64915e-08	16790	3.90529e-06	4.64915e-08
29065	2.09212e-06	4.64915e-08	17014	3.8588e-06	4.64915e-08
29224	2.04563e-06	4.64915e-08	17350	3.81231e-06	4.64915e-08
29229	1.99914e-06	4.64915e-08	17804	3.76581e-06	4.64915e-08
29248	1.95264e-06	4.64915e-08	18160	3.71932e-06	4.64915e-08
29254	1.90615e-06	4.64915e-08	18279	3.67283e-06	4.64915e-08
29298	1.85966e-06	4.64915e-08	18555	3.62634e-06	4.64915e-08
29353	1.81317e-06	4.64915e-08	18978	3.57985e-06	4.64915e-08
29356	1.76668e-06	4.64915e-08	19106	3.53336e-06	4.64915e-08
29396	1.72019e-06	4.64915e-08	19450	3.48686e-06	4.64915e-08
29428	1.6737e-06	4.64915e-08	20153	3.44037e-06	4.64915e-08
29456	1.6272e-06	1.06931e-06	20425	3.39388e-06	4.64915e-08
29461	5.57898e-07	4.64915e-08	20517	3.34739e-06	4.64915e-08
29469	5.11407e-07	4.64915e-08	20792	3.3009e-06	4.64915e-08
29479	4.64915e-07	4.64915e-08	21379	3.25441e-06	4.64915e-08
29492	4.18424e-07	4.64915e-08	21697	3.20792e-06	4.64915e-08
29510	3.71932e-07	4.64915e-08	21825	3.16142e-06	4.64915e-08
29514	3.25441e-07	4.64915e-08	22047	3.11493e-06	4.64915e-08
29533	2.78949e-07	4.64915e-08	22488	3.06844e-06	4.64915e-08
29557	2.32458e-07	4.64915e-08	22772	3.02195e-06	4.64915e-08
29574	1.85966e-07	4.64915e-08	23163	2.97546e-06	4.64915e-08
29580	1.39475e-07	4.64915e-08	23307	2.92897e-06	4.64915e-08
29596	9.29831e-08	4.64915e-08	23662	2.88248e-06	4.64915e-08
29619	4.64915e-08	4.64915e-08	24409	2.83598e-06	4.64915e-08
			24440	2.78949e-06	4.64915e-08
			24707	2.743e-06	4.64915e-08
			24865	2.69651e-06	4.64915e-08
			25033	2.65002e-06	4.64915e-08
			25352	2.60353e-06	4.64915e-08
			25504	2.55703e-06	1.06931e-06
			25507	1.48773e-06	4.64915e-08
			26035	1.44124e-06	4.64915e-08
			26053	1.39475e-06	4.64915e-08
			26680	1.34825e-06	4.64915e-08
			26718	1.30176e-06	4.64915e-08
			26802	1.25527e-06	4.64915e-08
			26932	1.20878e-06	4.64915e-08
			27107	1.16229e-06	4.64915e-08
			27165	1.1158e-06	4.64915e-08
			27302	1.06931e-06	4.64915e-08
			27343	1.02281e-06	4.64915e-08
			27471	9.76322e-07	4.64915e-08
			27532	9.29831e-07	4.64915e-08
			27559	8.83339e-07	4.64915e-08
			27596	8.36848e-07	4.64915e-08
			27636	7.90356e-07	4.64915e-08
			27663	7.43865e-07	4.64915e-08
			27758	6.97373e-07	4.64915e-08
			27763	6.50881e-07	4.64915e-08
			27825	6.0439e-07	4.64915e-08
			27879	5.57898e-07	4.64915e-08
			27890	5.11407e-07	4.64915e-08
			27919	4.64915e-07	4.64915e-08
			27926	4.18424e-07	4.64915e-08
			27939	3.71932e-07	4.64915e-08
			27960	3.25441e-07	4.64915e-08
			27969	2.78949e-07	4.64915e-08
			27987	2.32458e-07	4.64915e-08
			28011	1.85966e-07	4.64915e-08
			28013	1.39475e-07	4.64915e-08
			28032	9.29831e-08	4.64915e-08
			28059	4.64915e-08	4.64915e-08
