# Supplementary material for: Global analysis of DNA methylation in young (J1) and senescent (J2) Gossypium hirsutum L. cotyledons by MeDIP-Seq
Source: PLoS One. 2017 Jul 17;12(7):e0179141. doi: 10.1371/journal.pone.0179141 (PMC5513416; doi:10.1371/journal.pone.0179141)
Supplement: S16 Table — (XLSX) [file pone.0179141.s016.xlsx]

## Sheet: Sheet1
S16 Table. Primer sequences for bisulfite sequencing and qRT-PCR.
	Gene name	primer sequence	length of PCR product
qRT-PCR	GhCMT3F	TTACCAAGTCCGAATGGGAATGAT	378
	GhCMT3R	TCATCCGTGTTGAGTTGAAGTGG
	GhDRM1/2F	CATCCCTCTTATCGCTGCCTTCC	393
	GhDRM1/2R	AAGCAGACCTTACTTCTCGTGGG
	GhDRM3-F	TACGACGGTTGGGTCAAGATTTC	81
	GhDRM3-R	CCTATTTTCAGCGGGAAGATTGTG
	GhMET1F	TGTAGGGCTGACTTGTGAAAAA	233
	GhMET1R	AACCAGAGATGCCCCAAGACT
	GhDDM1-F	TCTGTTGAGTGCCGCATTTTG	120
	GhDDM1-R	TGTCCTCAGCAGTTTCTTCATCCC
	GhNERD-F	CTTGGATTGTATTCCCAGGAGCAGA	74
	GhNERD-R	GGACCATCTAGTCAGGGATCAGCAT
	GhNRPD1B-F	AACAGCATCAGTGGGGACAGAGTA	154
	GhNRPD1B-R	CATGAGTGGCTCAACATCCGAGA
	GhSAHH1-Fa	AACCGCATTAGGAGCCGAAGT	168
	GhSAHH1-Ra	CGTAACATCCCCACCATCATCAA
	GhSAHH1-Fb	CAGACCGCCGTCCTCATCG	102
	GhSAHH1-Rb	TCACCTTTCCAGGCGAACACG
	GhDMEF	ATGCTGCTTCTATCCCTACTCCA	84
	GhDMER	GATCATCAGGTTCCCGCTTTT
	GhROS1F	CAACAGTTACAAGCCGCATCCAC	346
	GhROS1R	AAGGTACTTGCACGGGTCGTCAG
	GhACTF	ATCCTCCGTCTTGACCTTG	197
	GhACTR	TGTCCGTCAGGCAACTCAT
	GhHisF	TCAAGACTGATTTGCGTTTCCA	100
	GhHisR	GCGCAAAGGTTGGTGTCTTC
BSP	CotAD_20715F	ATTGGAGGAATTGGAAGAGAT	322
	CotAD_20715R	TAATAACTCGACCATTCTCCG
	CotAD_44113F	AGTAGGAGGATTATTTGCGT	353
	CotAD_44113R	CTAATAACGCCTCCAAATCC
	CotAD_14795F	TTATTATGTGGGTTTTTGGGT	380
	CotAD_14795R	CCTCTTTTTTTACCTTAACGC
	CotAD_39214F	ACGATAGTGGGGAATGAGTTA	445
	CotAD_39214R	TTACGACGCTTTCTCAAAAAC
	CotAD_27532F	GAAAAGGGGGGAAAGATGAGG	324
	CotAD_27532R	AAACCCGAAAACCTATAACGA
	CotAD_48340F	ATATTTTTTGTGGGTTTTAGGTTAG	218
	CotAD_48340R	AATAAAACCAATAATTAAAAACATC

## Sheet: Sheet2
F primer	ATTGGAGGAATTGGAAGAGAT
R primer	TAATAACTCGACCATTCTCCG
GhMET1F	TGTAGGGCTGACTTGTGAAAAA	233
GhMET1R	AACCAGAGATGCCCCAAGACT
